# Supplementary material
Source: publisher figshare collection journal article supplement (https://f1000.figshare.com/ndownloader/files/1276533)
Supplement: Supplementary file 1 [file 1276533]

1400 ug/ml 48hr	700 ug/ml 48HR	300 ug/ml 48HR	1400 ug/ml 24hr	700 ug/ml 24hr	300 ug/ml 24hr	300 ug/ml control tissue	control N2 medium
1003.545714	691.8959459	1026.1228	2662.930716	2615.889906	949.0036881	729.3613645	656.5851049
779.0866447	1760.290885	2017.776995	4786.059757	2832.994176	1627.051321	614.9081232	648.3455869
506.9753446	1212.52134	702.7261202	2362.588411	1921.39949	2576.993597	957.864291	607.1573108
658.1428416	813.014145	1665.460897	2281.220726	3326.422703	3215.482545	883.9185483	1096.671327
730.063011	1772.537165	864.2962455	4303.821558	1786.634826	1452.47926	530.4187025	656.7800241
804.1492399	1729.332819	1856.137926	4404.768325	3086.83916	1836.100215	2083.750465	625.2295578
706.9031051	1608.139297	858.5010192	5569.149307	803.6715747	1147.323843	1019.238932	702.1794642
644.1863085	871.3759235	678.4452815	701.6323824	655.4143727	844.0663481	834.6112868	1013.066632
630.5299358	1143.07655	734.25881	830.4601134	670.6653413	4306.497417	742.923953	853.7165806
910.3142315	2663.795788	2115.996219	576.6662813	647.1599493	2341.473041	667.7963762	1411.268933
1041.96737	1829.395529	882.1791201	896.9994426	604.6221961	616.7787286	812.5416912	861.4778001
1094.919175	821.6276529	2169.342758		482.3940298	2071.119504	813.014145	1829.465496
1841.668808	2747.298309	1931.432629		615.740205	645.377409	749.1007943	1649.940605
1251.175447	1223.450857	1282.297937			957.0621714	926.6196631	770.163619
1078.309789							766.4985323
1227.73287
